# Supplementary material for: Identification of a New Antimicrobial Resistance Gene Provides Fresh Insights Into Pleuromutilin Resistance in Brachyspira hyodysenteriae, Aetiological Agent of Swine Dysentery
Source: Front Microbiol. 2018 Jun 19;9:1183. doi: 10.3389/fmicb.2018.01183 (PMC6018095; doi:10.3389/fmicb.2018.01183)
Supplement: Supplementary file 2 [file Table_2.xlsx]

## Sheet: Sheet1
Table S2. MICs for tylosin, tylvalosin, lincomycin and doxycycline obtained with the 34 field isolates and 3 control strains examined. Bold text indicates isolates above the ECOFF values as given in column headers. Mutations in 23S rRNA gene associated with resistance to macrolides, lincosamide, and tetracycline are shown; blank = wild-type. Isolates in same order as Table 1.
	Macrolides/Lincosamides				Tetracyclines
Isolate ID	Tylosin (ECOFF >16 mg/L)	Tylvalosin (ECOFF >1 mg/L)	Lincomycin (ECOFF >1 mg/L)	23S rRNA A2058T	Doxycycline (ECOFF >0.5 mg/L)	16S rRNA G1058C or T
WA1	>128	8	32	T	0.25
B204	128	1	8	T	1	C
B78T	<=2	<=0.25	<=0.5		0.25
P18A	>128	16	32	T	4	C
BH13	>128	8	64	T	2	C
BH26	>128	4	64	T	4	C
BH8	>128	4	32	T	8	C
BH35	>128	16	16	T	0.25
BH7	>128	16	16	T	0.25
BH9	>128	2	64	T	2	C
BH15	>128	4	32	T	8	C
BH2	>128	4	32	T	4	C
BH3	>128	2	16	T	2	C
BH20	<=2	0.5	<=0.5		<=0.125
BH28	>128	4	64	T	2	C
BH34	128	2	8	T	2	C
BH16	>128	32	32	T	0.5	C
BH14	>128	4	16	T	1	C
BH29	>128	4	32	T	2	C
BH37	>128	2	32	T	4	T
BH24	4	1	2		0.5
BH6	>128	4	64	T	8	T
BH38	16	16	32	T	0.25
BH25	>128	16	32	T	0.5	C
BH27	>128	4	64	T	4	C
BH17	>128	4	64	T	8	C
BH23	4	1	4		0.25
BH30	>128	16	64	T	0.5
BH32	>128	16	32	T	0.25
BH12	>128	8	64	T	4	C
BH33	>128	>32	32	T	0.25
BH36	>128	>32	32	T	0.25
BH18	>128	8	>64	T	1	C
BH19	>128	8	>64	T	2	C
BH21	>128	8	>64	T	8	C
BH22	>128	8	>64	T	2	C
BH31	>128	16	32	T	0.25
