# Supplementary material for: Identification of a New Antimicrobial Resistance Gene Provides Fresh Insights Into Pleuromutilin Resistance in Brachyspira hyodysenteriae, Aetiological Agent of Swine Dysentery
Source: Front Microbiol. 2018 Jun 19;9:1183. doi: 10.3389/fmicb.2018.01183 (PMC6018095; doi:10.3389/fmicb.2018.01183)
Supplement: Supplementary file 3 [file Table_3.xlsx]

## Sheet: Sheet1
Table S3. Prediction of reduced susceptibility to tylosin, tylvalosin, lincomycin and doxycycline based on the presence of mutations in chromosomal genes. Isolate genotypes and susceptibilities described in Table S2 and assessed using two-by-two table analysis. Specificity, sensitivity, and the predictive value of a positive and negative test were calculated as defined in Materials and Methods. V…
	Tylosin (SNPs)	Lincomycin (SNPs)	Tylvalosin (SNPs)	Doxycycline (SNPs)
True Positive	32	33	31	22
True Negative	4	3	4	13
False Positive	1	0	2	2
False Negative	0	1	0	0
Sensitivity	1	0.97	1	1
Specificity	0.8	1	0.666667	0.866667
Positive Predictive Value	0.969697	1	0.939394	0.916667
Negative Predictive Value	1	0.75	1	1

## Sheet: Sheet3
Table 2. Test performance using genotype to predict reduced susceptibility to tiamulin, valnemulin, tylosin, tylvalosin, lincomycin and doxycycline. Values calculated using two-by-two table analysis as defined in the table.
