# Supplementary material for: Identification of a New Antimicrobial Resistance Gene Provides Fresh Insights Into Pleuromutilin Resistance in Brachyspira hyodysenteriae, Aetiological Agent of Swine Dysentery
Source: Front Microbiol. 2018 Jun 19;9:1183. doi: 10.3389/fmicb.2018.01183 (PMC6018095; doi:10.3389/fmicb.2018.01183)
Supplement: Supplementary file 4 [file Table_4.XLSX]

## Sheet: Sheet1
Table S4. Number of isolates recovered in mutation concentration prevention experiments for each isolate at the tiamulin concentrations indicated. Isolates were tested twice at a given concentration where indicated by an asterisk (*). NT = Not tested. n/a = not applicable.
							Concentrations of tiamulin used (mg/L)
Isolate	Resistance Mutations	tva(A) Present/Absent	MIC tiamulin mg/L (Broth)	CFU/ml (repeat CFU/ml)	MPC:MIC ratio (selection Index)	Mutation frequency (# mutants/CFUml-1)	0.016	0.032	0.063	0.125	0.25	0.5	1	2	4	8	16	32	64	128
B78T	none		<=0.063	6.00E+08 (5.50E+08)	1	n/a	NT	NT	0*	0*	0*	0*	NT	NT	NT	NT	NT	NT	NT	NT
P18A	none		<=0.063	4.70E+09 (1.80E+08)	1	n/a	0	0	0*	0*	0*	0*	NT	NT	NT	NT	NT	NT	NT	NT
WA1	none		<=0.063	1600000000	1	n/a	NT	0	0	0	0	0	NT	NT	NT	NT	NT	NT	NT	NT
BH8	none		<=0.063	1.50E+09 (1.50E+09)	1	n/a	NT	0	0*	0	0	0	NT	NT	NT	NT	NT	NT	NT	NT
BH13	none		<=0.063	1.50E+08 (2.40E+08)	1	n/a	NT	0	0*	0*	0*	0*	NT	NT	NT	NT	NT	NT	NT	NT
BH26	none		<=0.063	330000000	1	n/a	0	0	0	0	0	0	NT	NT	NT	NT	NT	NT	NT	NT
BH15	23S rRNA G2535A	Present	0.25	5000000	1	2e-07	NT	NT	NT	NT	1	0	0	0	NT	NT	NT	NT	NT	NT
BH20	none	Present	0.25	290000000	4	3.44828e-08	NT	NT	NT	NT	1	6	3	0	NT	NT	NT	NT	NT	NT
BH14	none	Present	0.5	260000000	4	3.84615e-09	NT	NT	NT	NT	NT	0	0	1	0	NT	NT	NT	NT	NT
BH29	none	Present	0.5	100000000	8	2e-08	NT	NT	NT	NT	NT	0	0	0	2	NT	NT	NT	NT	NT
BH16	L3 protein N148S; 23SrRNA G2201T, G2535A		0.5	340000000	1	n/a	NT	NT	NT	NT	NT	0	0	0	0	NT	NT	NT	NT	NT
BH6	23S rRNA G2535A	Present	1	13000000	1	7.69231e-08	NT	NT	NT	NT	NT	NT	1	0	0	0	NT	NT	NT	NT
BH24	none	Present	1	680000000	1	n/a	NT	NT	NT	NT	NT	NT	0	0	0	0	NT	NT	NT	NT
BH38	none	Present	4	910000000	2	1.0989e-09	NT	NT	NT	NT	NT	NT	NT	NT	0	1	0	0	NT	NT
BH25	23S rRNA G2535A	Present	8	720000000	1	n/a	NT	NT	NT	NT	NT	NT	NT	NT	NT	0	0	0	0	NT
BH30	L3 protein N148S	Present	8	230000000	1	n/a	NT	NT	NT	NT	NT	NT	NT	NT	NT	0	0	0	0	NT
BH21	23S rRNA G2032A	Present	>8	190000000	1	n/a	NT	NT	NT	NT	NT	NT	NT	NT	NT	NT	0	0	0	0
BH33	L3 protein N148S; 23SrRNA G2201T, G2535A	Present	>8	680000000	1	n/a	NT	NT	NT	NT	NT	NT	NT	NT	NT	NT	0	0	0	0
* = isolate tested twice at this tiamulin concentration
NT = Not tested
n/a = not applicable
