# Supplementary material for: Identification of a New Antimicrobial Resistance Gene Provides Fresh Insights Into Pleuromutilin Resistance in Brachyspira hyodysenteriae, Aetiological Agent of Swine Dysentery
Source: Front Microbiol. 2018 Jun 19;9:1183. doi: 10.3389/fmicb.2018.01183 (PMC6018095; doi:10.3389/fmicb.2018.01183)
Supplement: Supplementary file 5 [file Table_5.XLSX]

## Sheet: Sheet1
Table S5. Summary of mutant isolates recovered from the mutation prevention concentration experiments. The tiamulin and valnemulin MIC values for parent and mutant isolates are shown. The number of SNPs present in each mutant but absent in the parent isolate, as identified by genome comparison, is indicated. Presented are the SNP details for ribosome-associated genes and a summary of location of …
Parent Isolate	Mutant Isolate	Parent tiamulin MIC (mg/L)	Mutant tiamulin MIC (mg/L)	Parent valnemulin MIC (mg/L)	Mutant valnemulin MIC (mg/L)	Total SNPs detected	SNPs in ribosome associated genes		Location of additional SNPs
							Gene	Mutation
BH6	BH6_1	1	4	0.5	4	2	fusA (BHWA1_RS10315)	A261V	BHWA1_RS02395 (methyl-accepting chemotaxis protein)
BH14	BH14_1	0.5	8	0.5	>4	4	23S rRNA (BHWA1_RS06460)	G1846T	non-coding region (3 SNPs)
BH15	BH15_1	0.25	4	0.25	4	1	none	none	BHWA1_RS12120 (ribose-phosphate pyrophosphokinase)
BH20	BH20_2	0.25	8	0.25	4	1	23S rRNA (BHWA1_RS06460)	C2499T
BH20	BH20_4	0.25	>8	0.25	>4	1	rplC (BHWA1_RS10330)	S149R
BH20	BH20_5	0.25	>8	0.25	>4	1	23S rRNA (BHWA1_RS06460)	C2055T
BH20	BH20_7	0.25	8	0.25	4	1	23S rRNA (BHWA1_RS06460)	C2499T
BH20	BH20_9	0.25	8	0.25	4	2	23S rRNA (BHWA1_RS06460)	C2499T	BHWA1_RS09220 (hypothetical protein)
BH20	BH20_10	0.25	>8	0.25	>4	1	23S rRNA (BHWA1_RS06460)	C2055T
BH20	BH20_11	0.25	>8	0.25	>4	1	23S rRNA (BHWA1_RS06460)	G2032A
BH20	BH20_12	0.25	8	0.25	4	1	23S rRNA (BHWA1_RS06460)	C2499T
BH20	BH20_15	0.25	8	0.25	4	1	23S rRNA (BHWA1_RS06460)	C2499T
BH20	BH20_16	0.25	8	0.25	>4	1	23S rRNA (BHWA1_RS06460)	C2055T
BH29	BH29_3	0.5	4	1	4	4	23S rRNA (BHWA1_RS06460)	G577A	non-coding region (3 SNPs)
BH29	BH29_4	0.5	8	1	4	6	23S rRNA (BHWA1_RS06460)	C1902T	non-coding region (3 SNPs); BHWA1_RS01000 (methyl-accepting chemotaxis protein); BHWA1_RS02820 (CDP-glycerol--glycerophosphate glycerophosphotransferase)
BH38	BH38_1	4	8	4	4	9	rplC (BHWA1_RS10330)	S149I	non-coding regions (7 SNPs); BHWA1_RS05975 (DNA-directed RNA polymerase sigma-24 subunit rpoE)

## Sheet: Sheet3
Table 3. Summary of mutant isolates recovered from the mutation prevention concentration experiments. The tiamulin and valnemulin MIC values for parent and mutant isolates are shown. The number of SNPs present in each mutant but absent in the parent isolate, as identified by genome comparison, is indicated. SNP details for ribosome-associated genes is given and a summary of location of all other …
